# Supplementary material
Source: PubMed Central journal article supplement (PMC3839108)
Supplement: NIHMS504412-supplement-Munoz-Soriano_et_al-SupplementalData_pdf.pdf [file NIHMS504412-supplement-Munoz-Soriano_et_al-SupplementalData_pdf.pdf]

**Supplemental Data:****Table S1. Primers and probes used for RT-qPCR analysis**

| <b>Gene</b>                           | <b>Taqman Primer/probe sequence</b>            |                               |
|---------------------------------------|------------------------------------------------|-------------------------------|
| <i><math>\alpha</math>-Tubulin84B</i> | F                                              | GTATCTCTATCCATGTTGGTCAGG      |
|                                       | R                                              | AGACGGCATCTGGCCATCG           |
|                                       | P                                              | ACGCCTGCTGGGAGCTCTACTGC       |
| <i>miple</i>                          | F                                              | GGAAAGTCCAAGGACAAAAGTG        |
|                                       | R                                              | AATCGAGTTCGATATCACTTAAACG     |
|                                       | P                                              | AACAAAGATAAAGCTGCTCGCAAAGGAC  |
| <i>CG32373</i>                        | F                                              | ACACACCGGACTTTGGTCTAGT        |
|                                       | R                                              | ATTATTGCAGCTTGCAGGATAGA       |
|                                       | P                                              | AAGTGCCTGGAATCCCTCGCA         |
| <i>mthl8</i>                          | F                                              | TTATTACGGCTCTAGGCTCATCTT      |
|                                       | R                                              | CACGAAAACAGGAGCGTAAAAATA      |
|                                       | P                                              | CTGGTTTGATCCACGCAATTGGTC      |
| <i>unc-13-4A</i>                      | F                                              | CAACTTTCATGGACTGAAACAAATC     |
|                                       | R                                              | AAAGTCCTGAGCCTGCTTGTC         |
|                                       | P                                              | CAAAAGGATAAATGCAATCCCATTTTGCA |
| <b>Gene</b>                           | <b>Primer sequence for Sybr green analysis</b> |                               |
| <i>nmo</i>                            | F                                              | CCTTCTCGGTGCTCTACACA          |
|                                       | R                                              | ACGCCCTCATCCAGATAC            |
| <i><math>\alpha</math>-Tubulin84B</i> | F                                              | CACTACACCATCGGCAAGGA          |
|                                       | R                                              | GCAGACCGGTGCACTGATC           |

F, forward; R, reverse; P,probe

**Table S2. List of genes significantly up-regulated in *arm*-GFP, *nmo*<sup>P1</sup> imaginal eye discs in a microarray analysis**

| Up-regulated genes                              |                           |               |
|-------------------------------------------------|---------------------------|---------------|
| Biological process                              | Adjusted <i>p</i> -value* | Fold change** |
| <b>General metabolism</b>                       |                           |               |
| <i>RFeSP</i>                                    | 0.0000005432              | 3.00          |
| <i>Mgstl</i>                                    | 0.0000052169              | 1.72          |
| <i>CG3788</i>                                   | 0.0000495427              | 1.71          |
| <i>CG8607</i>                                   | 0.000419257               | 1.66          |
| <i>CG6414</i>                                   | 0.000988570               | 1.47          |
| <i>Wwox</i>                                     | 0.003878009               | 0.71          |
| <i>Aprt</i>                                     | 0.004341881               | 0.69          |
| <i>Cyp9c1</i>                                   | 0.007195249               | 0.85          |
| <i>CG10175</i>                                  | 0.010326191               | 0.64          |
| <i>veil</i>                                     | 0.026866680               | 0.48          |
| <i>GS</i>                                       | 0.027082857               | 0.44          |
| <i>Fmo-1</i>                                    | 0.033828278               | 0.47          |
| <b>Protein metabolism</b>                       |                           |               |
| <i>CG7722</i>                                   | 0.002798614               | 0.70          |
| <i>Usp36</i>                                    | 0.009133010               | 0.58          |
| <i>CG32640</i>                                  | 0.010095192               | 0.54          |
| <i>Topors</i>                                   | 0.016110128               | 0.46          |
| <i>CG6357</i>                                   | 0.023230661               | 0.65          |
| <b>Carbohydrate metabolism</b>                  |                           |               |
| <i>CG11357</i>                                  | 4.74424E-06               | 4.08          |
| <i>sfl</i>                                      | 0.0000687907              | 2.69          |
| <i>CG11594</i>                                  | 0.001206152               | 2.01          |
| <i>CG18278</i>                                  | 0.009590515               | 1.00          |
| <i>CG3253</i>                                   | 0.011079780               | 0.62          |
| <i>Ch7</i>                                      | 0.022853142               | 0.84          |
| <i>pgant5</i>                                   | 0.030908713               | 0.54          |
| <i>CG15661</i>                                  | 0.005202531               | 1.13          |
| <b>Ion transport</b>                            |                           |               |
| <i>CG9826</i>                                   | 0.001347469               | 1.23          |
| <i>CG12455</i>                                  | 0.022527347               | 0.50          |
| <i>Nach</i>                                     | 0.038025986               | 0.69          |
| <b>Cytoskeleton biogenesis and organization</b> |                           |               |
| <i>hts</i>                                      | 0.0000410873              | 1.62          |
| <i>shi</i>                                      | 0.0000419885              | 1.74          |
| <i>Tektin A</i>                                 | 0.030870819               | 0.61          |
| <i>Aplip</i>                                    | 0.039368893               | 0.89          |
| <i>rib</i>                                      | 0.045443021               | 0.38          |
| <b>Signaling</b>                                |                           |               |

|                                                               |              |      |
|---------------------------------------------------------------|--------------|------|
| <i>miple</i>                                                  | 0.0000002411 | 4.29 |
| <i>mthl8</i>                                                  | 0.0000002411 | 3.62 |
|                                                               | 0.0000002551 | 4.27 |
| <i>Gr64a</i>                                                  | 0.000335219  | 1.38 |
| <i>fwd</i>                                                    | 0.000988570  | 1.47 |
| <i>Arr1</i>                                                   | 0.001519850  | 1.07 |
| <i>Gr64d/e</i>                                                | 0.003878009  | 0.86 |
| <i>CG7787</i>                                                 | 0.005202531  | 0.59 |
| <i>Spred</i>                                                  | 0.009658771  | 0.87 |
| <i>Gr64c/e</i>                                                | 0.016886397  | 0.79 |
| <i>Rh6</i>                                                    | 0.022853142  | 0.84 |
| <i>Pvf2</i>                                                   | 0.025250662  | 0.49 |
| <i>Phk-3</i>                                                  | 0.025818298  | 0.45 |
| <i>Obp83g</i>                                                 | 0.032014350  | 0.50 |
| <i>daw</i>                                                    | 0.035694755  | 0.47 |
| <i>CG9593</i>                                                 | 0.047404591  | 0.77 |
| <b>Adhesion</b>                                               |              |      |
| <i>mspo</i>                                                   | 0.000421616  | 1.47 |
| <i>off-track</i>                                              | 0.012004949  | 0.58 |
| <i>dumpy</i>                                                  | 0.024129666  | 0.63 |
| <i>ndl</i>                                                    | 0.029566669  | 0.41 |
| <b>Transcription, translation and nucleic acid metabolism</b> |              |      |
| <i>XRCC1</i>                                                  | 0.000335219  | 0.95 |
| <i>Ribosomal protein L28</i>                                  | 0.000340665  | 2.05 |
| <i>CG32281</i>                                                | 0.003115307  | 0.90 |
| <i>GVI</i>                                                    | 0.002438683  | 0.69 |
|                                                               | 0.003878009  | 0.68 |
| <i>CG32364</i>                                                | 0.005924707  | 0.78 |
| <i>CG300080</i>                                               | 0.010095192  | 1.13 |
| <i>CG6961</i>                                                 | 0.011330326  | 0.69 |
| <i>lola</i>                                                   | 0.013326317  | 0.77 |
| <i>TBPH</i>                                                   | 0.016712839  | 0.46 |
| <i>RpL22-like</i>                                             | 0.026590207  | 0.39 |
| <i>CG10306</i>                                                | 0.032077400  | 0.41 |
| <b>Unkown function</b>                                        |              |      |
| <i>CG17669</i>                                                | 0.0000002411 | 3.43 |
| <i>CG30190</i>                                                | 0.0000002843 | 2.75 |
| <i>CG15449</i>                                                | 0.0000584923 | 2.11 |
| <i>CG42351</i>                                                | 0.0000989489 | 2.72 |
|                                                               | 0.002634764  | 1.16 |
| <i>CG15747</i>                                                | 0.0002114938 | 1.21 |
| <i>CG15785</i>                                                | 0.000335219  | 1.10 |
| <i>CG30217</i>                                                | 0.000433933  | 1.29 |
| <i>CG16885</i>                                                | 0.000489149  | 2.15 |

|                 |             |      |
|-----------------|-------------|------|
|                 | 0.001519850 | 1.31 |
| <i>CG11073</i>  | 0.000507278 | 0.88 |
| <i>yellow-d</i> | 0.001422267 | 1.14 |
| <i>CG15786</i>  | 0.001533364 | 0.93 |
| <i>CG1317</i>   | 0.002386336 | 0.64 |
| <i>CG10344</i>  | 0.002684763 | 0.63 |
|                 | 0.025250662 | 0.58 |
| <i>CG11854</i>  | 0.003878009 | 0.70 |
| <i>CG7231</i>   | 0.009658771 | 0.49 |
| <i>CG15879</i>  | 0.015364244 | 1.08 |
| <i>CG9192</i>   | 0.016380643 | 1.30 |
| <i>CG32278</i>  | 0.017369068 | 0.52 |
| <i>Gmap</i>     | 0.020560697 | 0.50 |
| <i>CG11550</i>  | 0.022789551 | 0.46 |
| <i>CG34035</i>  | 0.024129666 | 0.65 |
| <i>CG30101</i>  | 0.026133796 | 0.73 |
|                 | 0.028708881 | 0.86 |
| <i>CG1368</i>   | 0.026133796 | 0.45 |
| <i>CG13791</i>  | 0.026133796 | 0.50 |
| <i>CG17841</i>  | 0.026368928 | 0.45 |
| <i>CG30017</i>  | 0.027082857 | 0.52 |
| <i>CG30118</i>  | 0.027945128 | 0.93 |
| <i>CG1344</i>   | 0.027945128 | 0.39 |
| <i>CG34057</i>  | 0.032014350 | 0.65 |
| <i>c11.1</i>    | 0.033533835 | 0.45 |
| <i>mam</i>      | 0.037080238 | 0.43 |
| <i>CG9021</i>   | 0.040526287 | 1.79 |
| <i>CG3880</i>   | 0.046911478 | 0.53 |
| <i>CG30222</i>  | 0.047965582 | 0.44 |
| <i>CG13335</i>  | 0.049876980 | 0.52 |
| <i>CG7016</i>   | 0.049876980 | 0.50 |
| <b>Others</b>   |             |      |
| <i>CG15313</i>  | 0.000480655 | 1.58 |
| <i>CG11170</i>  | 0.003878009 | 0.75 |
| <i>bip1</i>     | 0.006465021 | 0.80 |
| <i>Cpr47Ea</i>  | 0.010326191 | 0.64 |
| <i>CG3530</i>   | 0.011079780 | 0.62 |

\* Benjamini–Hochberg-adjusted *p-values* are shown. \*\* Fold change expressed as the  $\log_2$  of the ratio of the two compared mean intensities. A fold change of 2 represents a 2<sup>2</sup>-times increase in the expression in *nmo<sup>P1</sup>* mutants. Two Adjusted *p-value* and Fold change represent different probes in the array for the same gene.

**Table S3. List of genes significantly down-regulated in *arm*-GFP, *nmo*<sup>PI</sup> imaginal eye discs in a microarray analysis**

| Down-regulated                 |                            |                  |
|--------------------------------|----------------------------|------------------|
| Biological process             | Adjusted <i>p</i> -value * | Fold change *,** |
| <i>nmo</i>                     | 0.000000241                | -4.43            |
| <b>Signaling</b>               |                            |                  |
| <i>PGRP-LE</i>                 | 0.000008500                | -3.07            |
| <i>CG6701</i>                  | 0.006136463                | -0.68            |
| <i>mthl2</i>                   | 0.008026766                | -1.14            |
| <i>CkIIbeta</i>                | 0.009658771                | -0.51            |
| <i>Ptp99A</i>                  | 0.020420963                | -0.48            |
| <i>Klp54D</i>                  | 0.025250662                | -0.76            |
| <i>Tie</i>                     | 0.025818298                | -0.83            |
| <i>mthl4</i>                   | 0.027409617                | -0.58            |
| <i>EDTP</i>                    | 0.027409617                | -0.58            |
| <i>Nplp2</i>                   | 0.040173584                | -1.26            |
| <i>Pde9</i>                    | 0.048475136                | -0.60            |
| <b>General metabolism</b>      |                            |                  |
| <i>CG31809</i>                 | 0.012004949                | -1.04            |
| <i>Cyp4p1</i>                  | 0.014199627                | -0.53            |
| <i>GstE5</i>                   | 0.015586534                | -0.68            |
| <i>CG13325</i>                 | 0.016855433                | -0.49            |
| <i>CG11200/CG13868</i>         | 0.022129718                | -0.47            |
| <i>ssp3</i>                    | 0.027082857                | -0.41            |
| <i>CG15343</i>                 | 0.027794711                | -1.10            |
| <i>Gpo-1</i>                   | 0.031037805                | -0.56            |
| <i>phm</i>                     | 0.035454899                | -1.20            |
| <i>CG8193</i>                  | 0.046287086                | -1.28            |
| <i>CG8889</i>                  | 0.047965582                | -0.86            |
| <b>Carbohydrate metabolism</b> |                            |                  |
| <i>CG10924</i>                 | 0.004907708                | -0.57            |
| <i>cracked</i>                 | 0.010588946                | -0.89            |
| <i>CG13937</i>                 | 0.026133796                | -0.42            |
| <i>CG4351</i>                  | 0.032014350                | -0.43            |
| <i>CG18135</i>                 | 0.047404591                | -1.08            |
| <b>Protein metabolism</b>      |                            |                  |
| <i>CG17739</i>                 | 0.003878009                | -0.88            |
| <i>CG32412 (DromeQC)</i>       | 0.004907708                | -0.96            |
| <i>CG40072</i>                 | 0.025250662                | -0.78            |
| <i>fat spondin</i>             | 0.027409617                | -0.58            |
| <i>CG4408</i>                  | 0.036613926                | -0.97            |
| <b>Lipid metabolism</b>        |                            |                  |
| <i>CG13890</i>                 | 0.000218244                | -1.14            |

|                                                               |             |       |
|---------------------------------------------------------------|-------------|-------|
| <i>Reg-2</i>                                                  | 0.017373919 | -0.73 |
| <i>CG9009</i>                                                 | 0.021055261 | -0.47 |
| <i>CG10131</i>                                                | 0.044462459 | -0.77 |
| <b>Exocytosis</b>                                             |             |       |
| <i>sec6</i>                                                   | 0.017240975 | -0.48 |
| <b>Transcription, translation and nucleic acid metabolism</b> |             |       |
| <i>scribbler</i>                                              | 0.000241820 | -1.49 |
| <i>msl-3</i>                                                  | 0.000342548 | -1.38 |
|                                                               | 0.003675677 | -0.87 |
| <i>krimper</i>                                                | 0.001347469 | -1.11 |
| <i>CG10630</i>                                                | 0.007809501 | -1.01 |
| <i>CG12605</i>                                                | 0.014131140 | -0.56 |
| <i>CG11883</i>                                                | 0.017015276 | -0.44 |
| <i>CG13895</i>                                                | 0.029968609 | -0.73 |
| <i>dre4</i>                                                   | 0.034335820 | -0.47 |
| <i>mutator 2</i>                                              | 0.046333660 | -0.38 |
| <i>CG32006</i>                                                | 0.047404591 | -0.43 |
| <i>Su(z)12</i>                                                | 0.047404591 | -0.49 |
| <b>Cytoskeleton biogenesis and organization</b>               |             |       |
| <i>Kap3</i>                                                   | 0.047594869 | -0.44 |
| <b>Transport</b>                                              |             |       |
| <i>Glut1</i>                                                  | 0.000208607 | -1.09 |
| <i>CG30392</i>                                                | 0.001869396 | -0.87 |
| <i>Trn</i>                                                    | 0.006049149 | -0.98 |
| <i>Mdr65</i>                                                  | 0.017256934 | -0.81 |
| <i>Tom70</i>                                                  | 0.031037805 | -0.39 |
| <i>CG5535</i>                                                 | 0.046298994 | -0.43 |
| <i>CG9864</i>                                                 | 0.046368006 | -0.53 |
| <b>Unknown function</b>                                       |             |       |
| <i>CG32373</i>                                                | 0.000001675 | -3.05 |
| <i>CG12643</i>                                                | 0.000034931 | -1.81 |
| <i>pst</i>                                                    | 0.000246204 | -1.03 |
| <i>CG15784</i>                                                | 0.000284751 | -1.23 |
| <i>CG8209</i>                                                 | 0.000376479 | -1.01 |
| <i>CG12607</i>                                                | 0.001983851 | -1.09 |
| <i>CG14960</i>                                                | 0.005008857 | -0.75 |
| <i>CG42272</i>                                                | 0.005493316 | -0.67 |
| <i>CG6701</i>                                                 | 0.006136463 | -0.68 |
| <i>CG32368</i>                                                | 0.007942964 | -0.90 |
| <i>CG1092</i>                                                 | 0.008944602 | -0.98 |
| <i>CG13516</i>                                                | 0.009993200 | -0.87 |
| <i>CG15312</i>                                                | 0.010588946 | -0.89 |
| <i>CG6579</i>                                                 | 0.011809099 | -0.72 |
| <i>CG10855</i>                                                | 0.012919961 | -0.74 |
| <i>CG34342</i>                                                | 0.012919961 | -0.72 |

|                                |             |       |
|--------------------------------|-------------|-------|
| <i>CG13679</i>                 | 0.013938244 | -0.64 |
| <i>small non-messenger RNA</i> |             |       |
| <i>60Cb/snoRNA:Or-CD9b</i>     | 0.014083209 | -0.85 |
| <i>CG30380</i>                 | 0.014131140 | -0.98 |
| <i>CG8501</i>                  | 0.014199627 | -0.80 |
| <i>CG42565/CG42566</i>         | 0.014365537 | -1.09 |
| <i>CG34331</i>                 | 0.016855433 | -0.94 |
| <i>Fie</i>                     | 0.017170357 | -0.79 |
| <i>CG33494</i>                 | 0.018713506 | -0.61 |
| <i>CG15073</i>                 | 0.022763693 | -0.57 |
| <i>CG13896</i>                 | 0.024325182 | -0.54 |
| <i>CG7852</i>                  | 0.026133796 | -0.52 |
| <i>CG11475</i>                 | 0.026133796 | -0.41 |
| <i>CG32663</i>                 | 0.026133796 | -0.41 |
| <i>CG2469</i>                  | 0.031037805 | -0.38 |
| <i>CG13531</i>                 | 0.034675021 | -0.50 |
| <i>CG14962</i>                 | 0.039533382 | -0.66 |
| <i>CG13679</i>                 | 0.042359317 | -0.55 |
|                                | 0.044111239 | -0.58 |
| <i>CG5704</i>                  | 0.044924698 | -0.58 |
| <b>Adhesion</b>                |             |       |
| <i>unc-13-4A</i>               | 0.000021273 | -2.54 |
| <i>lectin-28C</i>              | 0.018550832 | -1.24 |
| <i>del</i>                     | 0.026133796 | -0.55 |
| <i>Cht6</i>                    | 0.042359317 | -0.42 |
| <b>Others</b>                  |             |       |
| <i>Spinophilin</i>             | 0.000218244 | -1.77 |
| <i>MtnA</i>                    | 0.003171962 | -0.97 |
| <i>CG15021</i>                 | 0.023240118 | -1.36 |
| <i>ssp3</i>                    | 0.027082857 | -0.41 |
| <i>CG13398</i>                 | 0.028632409 | -0.60 |
| <i>CG1240</i>                  | 0.033257010 | -0.37 |
| <i>MtnB</i>                    | 0.047404591 | -1.08 |

\* Benjamini–Hochberg-adjusted *p-values* are shown. \*\* Fold change expressed as the  $\log_2$  of the ratio of the two compared mean intensities. A fold change of -2 represents a 2<sup>2</sup>-times decrease in the expression in *nmo<sup>P1</sup>* mutants. Two Adjusted *p-value* and Fold change represent different probes in the array for the same gene.
